# Supplementary material
Source: publisher figshare collection journal article supplement (https://brill.figshare.com/articles/dataset/_/19042457)
Supplement: Supplementary file 1 [file 1]

# **The role of lemur seed dispersal in restoring degraded forest ecosystems in Madagascar**

Kim J.E. Steffens<sup>a,\*</sup>, Justin Sanamo<sup>b</sup>, Jeremi Razafitsalama<sup>c</sup>

<sup>a</sup>Department of Biology, Institute of Zoology, Universität Hamburg, Martin-Luther-King Platz 3, 20146 Hamburg, Germany

<sup>b</sup>Département Sciences de la Nature et de l'Environnement, Facultés des Sciences, Université d'Antsiranana, Antsiranana 201, Madagascar

<sup>c</sup>Missouri Botanical Garden Antsiranana, BP 268, Antsiranana 201, Madagascar

\*Corresponding author; e-mail: kimsteffens1@gmail.com

ORCID iD: Steffens: 0000-0002-3261-044X

## **Supplementary material**

**Table S1.** Characteristics of plant species whose seeds were dispersed and whose entire fruits were swallowed by crowned lemurs in Oranjia, northern Madagascar; and mean lengths of seeds/ fruits (bold). Abbreviations column Distribution (*Catalogue of the Vascular Plants of Madagascar*; Madagascar Catalogue, 2021): "end" = endemic, "nnend" = native, but not endemic, "natu" = naturalized; column IUCN Red List Status (IUCN, 2021): "ni" = not included, "LC" = Least Concern, "NT" = Near Threatened, "V" = Vulnerable, "En" = Endangered; columns Seed/Fruit size category: "s" = small (<5 mm), "m" = medium (5-10 mm), "l" = large (>10 mm); NA = "not applicable". Please note that plant species are sorted in descending order, according to the number of seeds dispersed. For *Ficus* sp. 3, seeds were too little and numerous to count.

**Table S2.** Comparison of the results of studies on the number of plant species dispersed by different *Eulemur* species. <sup>a</sup>From Goodman et al. (2018), <sup>b</sup>from Rabenantoandro et al. (2007).

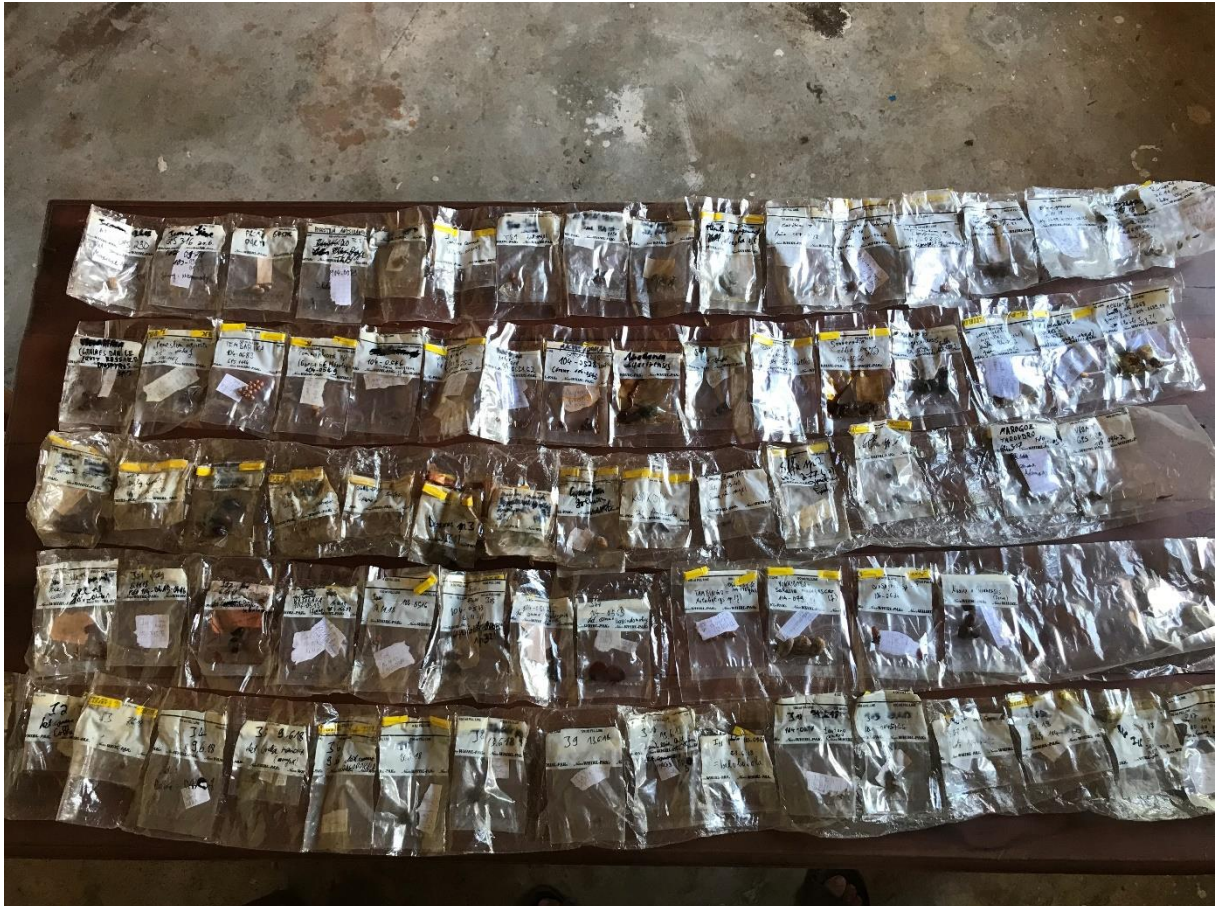

**Fig. S1.** Photograph showing the reference collection of seeds, produced by KJES and JS.

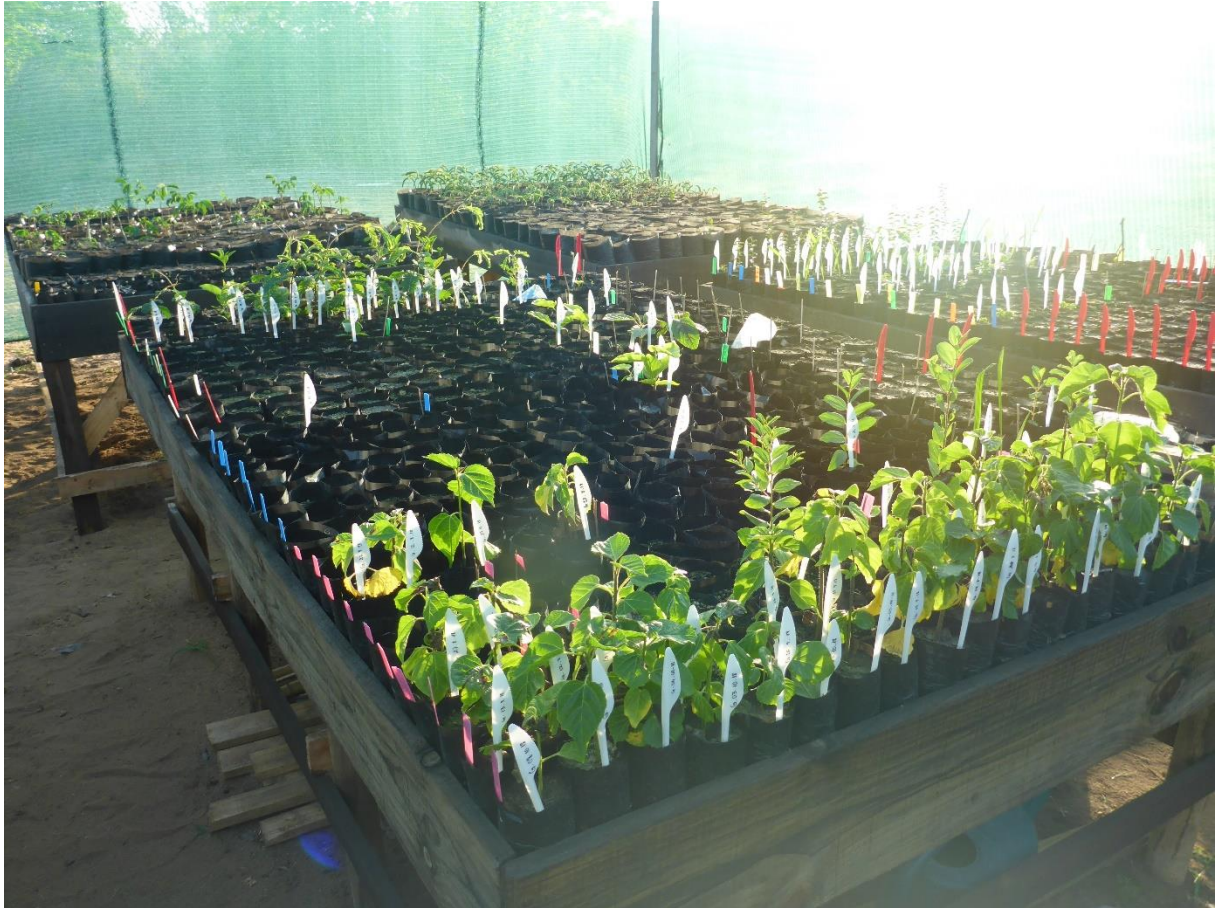

**Fig. S2.** Photograph showing the tree nursery of the Missouri Botanical Garden in Oronjia, where the germination experiments of this study were conducted.
