# Supplementary material
Source: publisher figshare collection journal article supplement (https://brill.figshare.com/articles/dataset/_/19042457)
Supplement: Supplementary file 1 [file 1]

## Sheet: Table S1
Plant species	Number of seeds dispersed	Distribution (Catalogue of the Vascular Plants of Madagascar)	IUCN Red List Status	Mean seed length (mm); SD; N	Seed size category	Mean fruit length (mm); SD; N	Fruit size category
Ficus sp. 3	NA	NA	NA	1; SD = 0; N = 20	s	17.7; SD = 1.9; N = 20	l
Capuronia benoistii	4583	end	LC	3.2; SD = 0.4; N = 20	s	7.4; SD = 0.7; N = 20	m
Cissus lanea	3426	end	ni	2; SD = 0; N = 20	s	8.5; SD = 0.5; N = 20	m
Ampelocissus sphaerophylla	3258	end	ni	8.2; SD = 0.8; N = 20	m	10.1; SD = 0.6; N = 20	l
Tricalysia ovalifolia	2677	nnend	ni	4.2; SD = 0.4; N = 20	s	5.9; SD = 0.6; N = 20	m
Flacourtia ramontchi	2499	nnend	ni	5.5; SD = 0.6; N = 20	m	18.1; SD = 1.8; N = 20	l
Phyllanthus casticum	2099	nnend	LC	2; SD = 0; N = 20	s	7; SD = 0; N = 20	m
Senna petersiana	1923	natu	LC	4.6; SD = 0.6; N = 20	s
Erythroxylum rignyanum	1416	end	ni	9.7; SD = 0.7; N = 20	m	11.2; SD = 0.6; N = 20	l
Macphersonia gracilis	790	nnend	LC	8.7; SD = 1; N = 19	m
Diospyros analamerensis	684	end	EN	13.5; SD = 0.6; N = 20	l
Diospyros aculeata	497	end	LC	14.4; SD = 0.8; N = 20	l
Lantana camara	469	natu	ni	4.9; SD = 0.5; N = 20	s	5.2; SD = 0.7; N = 20	m
Cinnamosma madagascariensis	441	end	LC	9.7; SD = 2.8; N = 26	m
Terminalia mantaly	381	end	LC	12; SD = 3.1; N = 20	l	18; SD = 3; N = 20	l
Terminalia ankaranensis	376	end	V	8.6; SD = 1.1; N = 20	m	10.8; SD = 0.6; N = 20	l
Landolphia sp.	333	NA	NA	16.5; SD = 0.8; N = 20	l
Grewia sp. 1	329	NA	NA			11.3; SD = 0.6; N = 20	l
Operculicarya sp. 1	300	NA	NA	7.3; SD = 0.4; N = 20	m	9.3; SD = 0.5; N = 20	m
Pyrostria antsirananensis	268	end	ni	4; SD = 0.5; N = 20	s	4; SD = 0.2; N = 20	s
Xanthocercis madagascariensis	237	end	LC	16; SD = 1.4; N = 20	l
Capurodendron nodosum	233	end	V	12.6; SD = 1.3; N = 20	l
Berchemia discolor	232	nnend	LC	14.7; SD = 0.9; N = 20	l
Petchia sp.	219	NA	NA	10.2; SD = 0.7; N = 20	l	14.5; SD = 1.2; N = 20	l
Diospyros perrieri	191	end	NT	13.2; SD = 1.5; N = 20	l
Thilachium panduriforme	171	end	ni	6.2; SD = 0.5; N = 20	m
Grewia lapiazicola	144	end	V	4.5; SD = 0.6; N = 20	s	13; SD = 1.4; N = 20	l
Salacia madagascariensis	138	other	ni	18.8; SD = 1.8; N = 20	l
Tacca pinnatifida	131	natu	ni	7.3; SD = 0.8; N = 20	m
Unidentified species (I45)	128	NA	NA	4.7; SD = 0.7; N = 20	s
Diospyros sp. 3	123	NA	NA	10.1; SD = 0.8; N = 20	l	15.6; SD = 1.6; N = 20	l
Strychnos madagascariensis	120	nnend	LC	16; SD = 1.2; N = 20	l
Lythraceae	107	NA	NA	4.7; SD = 0.5; N = 20	s
Diospyros vescoi	105	end	LC	16.4; SD = 1.1; N = 20	l
Carissa sp.	105	NA	NA	7.2; SD = 0.7; N = 20	m	10.1; SD = 1.6; N = 20	l
Bakerella sp. 1	93	NA	NA
Verbenaceae 4	92	NA	NA	4.7; SD = 0.5; N = 20	s	6.1; SD = 0.7; N = 20	m
Operculicarya sp. 2	75	NA	NA	18.7; SD = 1; N = 20	l
Allophylus sp.	71	NA	NA	6; SD = 0.7; N = 20	m	7.5; SD = 0.5; N = 20	m
Garcinia verrucosa	65	end	LC	27; SD = 3.7; N = 20	l
Rhopalocarpus suarezensis	61	end	V	15.4; SD = 1.1; N = 20	l
Diospyros sp. 7	60	NA	NA	11.9; SD = 0.7; N = 20	l	19.9; SD = 1.5; N = 20	l
Trilepisium sp.	59	NA	NA	10.1; SDb = 0.8; N = 20	l	15; SD = 0.7; N = 20	l
Bakerella sp. 2	57	NA	NA
Bremeria sp.	57	NA	NA	10.9; SD = 0.8; N = 20	l
Diospyros cf. olacinoides	55	end	LC	8.8; SD = 0.6; N = 20	m	13; SD = 1.3; N = 20	l
Cissus microdonta	49	nnend	ni	7.9; SD = 0.7; N = 20	m	8.5; SD = 1; N = 20	m
Azima tetracantha	41	nnend	LC	5.6; SD = 0.6; N = 16	m
Cassia alata	34	natu	LC
Erythroxylum platyclados	34	other	ni	5.5; SD = 0.5; N = 20	m	6.4; SD = 0.5; N = 20	m
Olax dissitiflora	27	nnend	LC	13.2; SD = 1; N = 20	l	16.6; SD = 0.8; N = 20	l
Phoenix reclinata	26	nnend	LC			14.2; SD = 0.7; N = 20	l
Cordia lowryana	25	end	LC	12.4; SD = 1.5; N = 15	l	20.2; SD = 1.2; N = 20	l
Tamarindus indica	24	nnend	LC
Menispermaceae	24	NA	NA	14.5; SD = 1.5; N = 20	l
Unidentified species (I36)	23	NA	NA	9.8; SD = 1; N = 19	m
Abrahamia suarezensis	22	end	LC	27.4; SD = 2.5; N = 19	l
Mystroxylon aethiopicum	21	nnend	LC	9.2; SD = 1.1; N = 18	m	10.4; SD = 0.6; N = 20	l
Cordia myxa	20	other	ni	15; SD = 2.5; N = 19	l	23.9; SD = 2.1; N = 20	l
Ziziphus spina-christi	17	other	LC	11.6; SD = 1.6; N = 20	l	17.4; SD = 2; N = 20	l
Terminalia calcicola	15	end	LC	16.3; SD = 1.2; N = 19	l	15.7; SD = 0.5; N = 20	l
Olax capuronii	13	end	V			6.6; SD = 0.5; N = 20	m
Rinorea sp. 1	12	NA	NA
Strychnos panganensis	10	nnend	ni
Acanthaceae	10	NA	NA
Annona squamosa	9	other	LC	14.6; SD = 1.2; N = 15	l
Mimusops coriacea	9	nnend	ni			33.7; SD = 2.8; N = 20	l
Diospyros pruinosa	8	end	LC
Rhamnaceae	6	NA	NA
Sclerocarya birrea	5	nnend	ni			34.9; SD = 1.8; N = 20	l
Rinorea sp. 3	5	NA	NA
Unidentified species (I48)	5	NA	NA
Erythroxylum pervillei	4	end	ni
Unidentified species (I49)	4	NA	NA
Adenia firingalavensis	3	end	ni
Cissus sp.	2	NA	NA
Capurodendron greveanum	1	end	LC
Uvaria antsiranensis	1	end	V
Rubiaceae	1	NA	NA
Unidentified species (I50)	1	NA	NA

## Sheet: Table S2
Reference	Eulemur species	Study site	Number of plant species dispersed	Number of plant species occurring	Share of dispersed in occurring plant species	Sampling effort (h)	Sampling timing	Sampling method
Razafindratsima et al. (2014), Razafindratsima and Dunham (2015)	E. rufifrons	Ranomafana National Park	25	938a	3%	524	Wet + dry season	Habituation, behavioural observation, feces analysis
Razafindratsima et al. (2014), Razafindratsima and Dunham (2015)	E. rubriventer	Ranomafana National Park	26	938a	3%	524	Wet + dry season	Habituation, behavioural observation, feces analysis
Sato (2012)	E. fulvus	Ankarafantsika National Park	70	520a	13%	1212	Wet + dry season	Habituation, behavioural observation, feces analysis
Birkinshaw (2001)	E. macaco	Lokobe National Park	57	363a	16%	1272	Wet + dry season	Habituation, behavioural observation, feces analysis
Bollen et al. (2004)	E. collaris	Sainte Luce: Forest fragment S9	100	259b	39%	?	Wet + dry season	Tree watches, opportunistic observations, feces analysis, fruit-trap analysis
This study	E. coronatus	Oronjia New Protected Area	80	290a	28%	527	Wet + dry season	Habituation, behavioural observation, feces analysis
